# Supplementary material for: Effect of the Adhesive Strategy on Clinical Performance and Marginal Integrity of a Universal Adhesive in Non-Carious Cervical Lesions in a Randomized 36-Month Study
Source: MDPI journal article supplement (doi:10.3390/jcm12185776), 2023-09-05
Supplement: s1 [file s1]

## Supplementary information

**Supplementary Table S1 - Additional statistical information:** Significant increases of mean values for marginal gap (Table 5) and significant decreases of perfect margin (p<sub>i</sub>) within the groups from baseline (BL) up to 36 months (m).

| Parameter      | Period       | iBU-SE             | iBU-SEE            | iBU-ER             | OFL          |
|----------------|--------------|--------------------|--------------------|--------------------|--------------|
| Marginal gap   | BL to 6 m    | 0.063 <sup>1</sup> | 1.000              | 0.063 <sup>1</sup> | 0.206        |
|                | BL to 12 m   | 0.078              | 0.500              | 0.063 <sup>1</sup> | 0.083        |
|                | BL to 24 m   | <b>0.004</b>       | 0.125              | 0.063 <sup>1</sup> | <b>0.019</b> |
|                | BL to 36 m   | <b>0.004</b>       | 0.063 <sup>1</sup> | <b>0.016</b>       | <b>0.019</b> |
|                | 6 m to 12 m  | 0.078              | 0.500              | 0.063 <sup>1</sup> | <b>0.004</b> |
|                | 6 m to 24 m  | <b>0.004</b>       | 0.125              | 0.063 <sup>1</sup> | <b>0.002</b> |
|                | 6 m to 36 m  | <b>0.004</b>       | 0.063 <sup>1</sup> | <b>0.016</b>       | <b>0.002</b> |
|                | 12 m to 24 m | <b>0.004</b>       | 0.125              | 0.063 <sup>1</sup> | 0.416        |
|                | 12 m to 36 m | <b>0.004</b>       | 0.063 <sup>1</sup> | <b>0.016</b>       | 0.311        |
| Perfect margin | 24 m to 36 m | <b>0.004</b>       | 0.063 <sup>1</sup> | <b>0.016</b>       | <b>0.002</b> |
|                | BL to 6 m    | <b>0.032</b>       | <b>0.024</b>       | <b>0.019</b>       | 0.147        |
|                | BL to 12 m   | <b>0.001</b>       | 0.278              | <b>0.005</b>       | <b>0.042</b> |
|                | BL to 24 m   | <b>0.007</b>       | <b>0.032</b>       | <b>0.001</b>       | <b>0.002</b> |
|                | BL to 36 m   | <b>0.019</b>       | <b>0.006</b>       | <b>0.001</b>       | <b>0.001</b> |
|                | 6 m to 12 m  | 0.278              | 0.320              | 0.520              | 0.520        |
|                | 6 m to 24 m  | <b>0.042</b>       | 0.260              | <b>0.019</b>       | <b>0.019</b> |
|                | 6 m to 36 m  | 0.413              | <b>0.019</b>       | <b>0.014</b>       | <b>0.014</b> |
|                | 12 m to 24 m | 0.084              | 0.083              | <b>0.032</b>       | <b>0.005</b> |
|                | 12 m to 36 m | 0.413              | <b>0.019</b>       | <b>0.005</b>       | <b>0.001</b> |
|                | 24 m to 36 m | 0.320              | 0.240              | <b>0.007</b>       | 0.830        |

Bold: significant; <sup>1</sup>trend.
